# Supplementary material for: Selective removal of Cr2O72− in aqueous solution by nonporous pure crystals of cucurbit[6]uril
Source: Royal Society of Chemistry journal article supplement (doi:10.1039/d4dt00611a), 2024-01-01
Supplement: d4dt00611a1.pdf [file d4dt00611a1.pdf]

## Electronic supplementary information (ESI)

### Selective removal of $\text{Cr}_2\text{O}_7^{2-}$ in aqueous solution by one nonporous pure crystals of cucurbit[6]uril

Jing Xu<sup>a,\*</sup>, Bin Li<sup>a,\*</sup>, Xiu-Du Zhang<sup>b,\*</sup>, Dong Wu<sup>c,\*</sup>, Jiang-Lin Zhao<sup>d</sup> and Kai Chen<sup>a,\*</sup>

---

<sup>a</sup>*Collaborative Innovation Center of Atmospheric Environment and Equipment Technology, Jiangsu Key Laboratory of Atmospheric Environment Monitoring and Pollution Control, School of Environmental Science and Engineering, Nanjing University of Information Science & Technology, Nanjing 210044 China.*

<sup>b</sup>*College of Chemistry and Materials Science, Key Laboratory of Functional Molecular Solids, Ministry of Education, Anhui Laboratory of Molecule-Based Materials, Anhui Key Laboratory of Functional Molecular Solids, Anhui Normal University, 189 Jiuhua Southern Road, Wuhu 241002 (China).*

<sup>c</sup>*Computer Aided Drug Discovery Center, Zhuhai Institute of Advanced Technology, Chinese Academy of Sciences, Zhuhai 519003, China. E-mail: wudong@ziat.ac.cn*

<sup>d</sup>*Precision Medicine R&D Center, Zhuhai Institute of Advanced Technology, Chinese Academy of Sciences, Zhuhai 519080 Guangdong, China.*

\* Corresponding author.

*Email address: xiuduzhang@ahnu.edu.cn (X.D. Zhang).*

## Experimental section

**Materials and General Methods.** All reagents and solvents were commercially purchased and used as received without further purification. The host molecule cucurbit[6]uril (Q[6]) was synthesized according to the previously reported methods.<sup>1</sup> Powder X-ray diffraction (PXRD) data were collected at room temperature with Cu K $\alpha$  radiation (1.54059 Å) using a Bruker D8 Advance X-ray diffractometer. Inductively coupled plasma optical emission spectrometer (ICP-OES) measurements were carried out using Optima 5300 DV. UV-vis measurements were conducted at room temperature on a Metash 6100 UV-vis spectrophotometer. The morphology was evaluated using scanning electron microscopy (SEM, Hitachi S-8100) at an accelerating voltage of 5 kV and energy-dispersive X-ray spectroscopy (EDS) was also obtained using the SEM instrument. The molecular particle sizes were measured by a DelsaNanoC DLS analyzer (Beckman. Coulter, Inc., U.S.A.). X-ray photoelectron spectroscopy (XPS) experiments were conducted on a Kratos AXIS Ultra DLD spectrometer.

**X-ray crystallography.** Intensity data were collected on a Bruker D8 Venture Photon II diffractometer with graphite-monochromated Ga K $\alpha$  radiation ( $\lambda = 1.34139$  Å) using the  $\omega$ -scan technique. The SAINT program was used for the integration of the diffraction data and the intensity correction for the Lorentz and polarization effects.<sup>2</sup> Semi-empirical absorption corrections were applied using a SADABS program.<sup>3</sup> The structures were solved by direct methods and refined with the full-matrix least-squares technique based on  $F^2$  using the SHELXL-2018 program.<sup>4</sup> Some highly disordered water molecules in the unit cell have been taken into account with the SQUEEZE option of the PLATON program.<sup>5</sup> All non-hydrogen atoms were refined anisotropically. The hydrogen atoms of the water molecules were located from the difference Fourier maps and refined with restraint of the O–H and H $\cdots$ H distance (0.96 Å and 1.52 Å, respectively). Other hydrogen atoms were introduced at the calculated positions. The Cr<sub>2</sub>O<sub>7</sub><sup>2-</sup> is disordered into two positions each with a site occupancy of 0.5. The details of the crystal parameters, data collection, and refinements are listed in Table S1 and selected bond lengths and angles are given in Table S2.

**Table S1.** Crystal data and structure refinements for **1** (Q[6]Cr<sub>2</sub>O<sub>7</sub><sup>2-</sup>).

|                                                                  | <b>1</b> (Q[6]Cr <sub>2</sub> O <sub>7</sub> <sup>2-</sup> )                    |
|------------------------------------------------------------------|---------------------------------------------------------------------------------|
| Formula                                                          | C <sub>36</sub> H <sub>54</sub> N <sub>24</sub> O <sub>27</sub> Cr <sub>2</sub> |
| Formula weight                                                   | 1359.03                                                                         |
| T (K)                                                            | 293(2)                                                                          |
| $\lambda$ (Å)                                                    | 1.34139                                                                         |
| Crystal system                                                   | Orthorhombic                                                                    |
| Space group                                                      | <i>Pnmm</i>                                                                     |
| <i>a</i> (Å)                                                     | 15.901(2)                                                                       |
| <i>b</i> (Å)                                                     | 11.616(2)                                                                       |
| <i>c</i> (Å)                                                     | 15.297(3)                                                                       |
| <i>V</i> (Å <sup>3</sup> )                                       | 2825.5(8)                                                                       |
| <i>Z</i>                                                         | 2                                                                               |
| <i>D</i> <sub>calc</sub> (g cm <sup>-3</sup> )                   | 1.597                                                                           |
| $\mu$ /mm <sup>-1</sup>                                          | 2.796                                                                           |
| <i>F</i> (000)                                                   | 1404                                                                            |
| $\theta$ for data collection (°)                                 | 4.100 - 54.006                                                                  |
| Reflections collected                                            | 9527                                                                            |
| Independent reflections                                          | 2665                                                                            |
| Data / restraints / parameters                                   | 2665 / 60 / 261                                                                 |
| Goodness-of-fit on <i>F</i> <sup>2</sup>                         | 1.115                                                                           |
| <i>R</i> <sub>1</sub> <sup>a</sup> [ <i>I</i> > 2σ( <i>I</i> )]  | 0.1063                                                                          |
| <i>wR</i> <sub>2</sub> <sup>b</sup> [ <i>I</i> > 2σ( <i>I</i> )] | 0.2534                                                                          |
| <i>R</i> <sub>1</sub> [all data]                                 | 0.1740                                                                          |
| <i>R</i> <sub>1</sub> [all data]                                 | 0.2850                                                                          |

<sup>a</sup> $R_1 = \frac{\sum ||F_o| - |F_c||}{\sum |F_o|}$ . <sup>b</sup> $wR_2 = \frac{|\sum w(|F_o|^2 - |F_c|^2)|}{\sum w(F_o)^2}^{1/2}$ , where  $w = \frac{1}{[\sigma^2(F_o^2) + (aP)^2 + bP]}$ .  $P = (F_o^2 + 2F_c^2)/3$

**Table S2.** Selected bond lengths (Å) and angles (°) for **1**.

| <b>1</b>             |           |                       |           |
|----------------------|-----------|-----------------------|-----------|
| Cr(1)-O(5)           | 1.474(19) | Cr(1)-O(6)            | 1.592(15) |
| Cr(1)-O(10)#1        | 1.710(14) | Cr(1)-O(10)           | 1.710(14) |
| Cr(1)-O(7)           | 2.21(3)   | Cr(1)-O(7)#1          | 2.21(3)   |
| Cr(2)-O(7)           | 1.43(3)   | Cr(2)-O(7)#2          | 1.43(3)   |
| Cr(2)-O(9)#2         | 1.58(3)   | Cr(2)-O(9)            | 1.58(3)   |
| Cr(2)-O(8)           | 1.67(2)   | Cr(2)-O(8)#2          | 1.67(2)   |
| Cr(2)-O(10)#1        | 2.038(15) | Cr(2)-O(10)#3         | 2.038(15) |
| O(5)-Cr(1)-O(6)      | 107.1(9)  | O(5)-Cr(1)-O(10)#1    | 110.1(6)  |
| O(6)-Cr(1)-O(10)#1   | 110.8(5)  | O(5)-Cr(1)-O(10)      | 110.1(6)  |
| O(6)-Cr(1)-O(10)     | 110.8(5)  | O(10)#1-Cr(1)-O(10)   | 108.0(10) |
| O(5)-Cr(1)-O(7)      | 128.5(8)  | O(6)-Cr(1)-O(7)       | 107.8(8)  |
| O(10)-Cr(1)-O(7)     | 91.2(9)   | O(10)#1-Cr(1)-O(7)#1  | 91.2(9)   |
| O(7)-Cr(2)-O(9)      | 115.5(14) | O(7)#2-Cr(2)-O(9)     | 104.6(14) |
| O(9)#2-Cr(2)-O(9)    | 124.6(19) | O(7)-Cr(2)-O(8)       | 120.1(14) |
| O(7)#2-Cr(2)-O(8)    | 120.5(14) | O(9)-Cr(2)-O(8)       | 108.6(13) |
| O(7)#2-Cr(2)-O(10)#1 | 103.8(12) | O(9)#2-Cr(2)-O(10)#1  | 102.7(10) |
| O(9)-Cr(2)-O(10)#1   | 102.9(10) | O(8)-Cr(2)-O(10)#1    | 114.6(9)  |
| O(8)#2-Cr(2)-O(10)#1 | 103.7(9)  | O(10)#1-Cr(2)-O(10)#3 | 123.1(8)  |

Symmetry codes: #1 x, y, -z+1; #2 -x+1, -y, z; #3 -x+1, -y, -z+1.

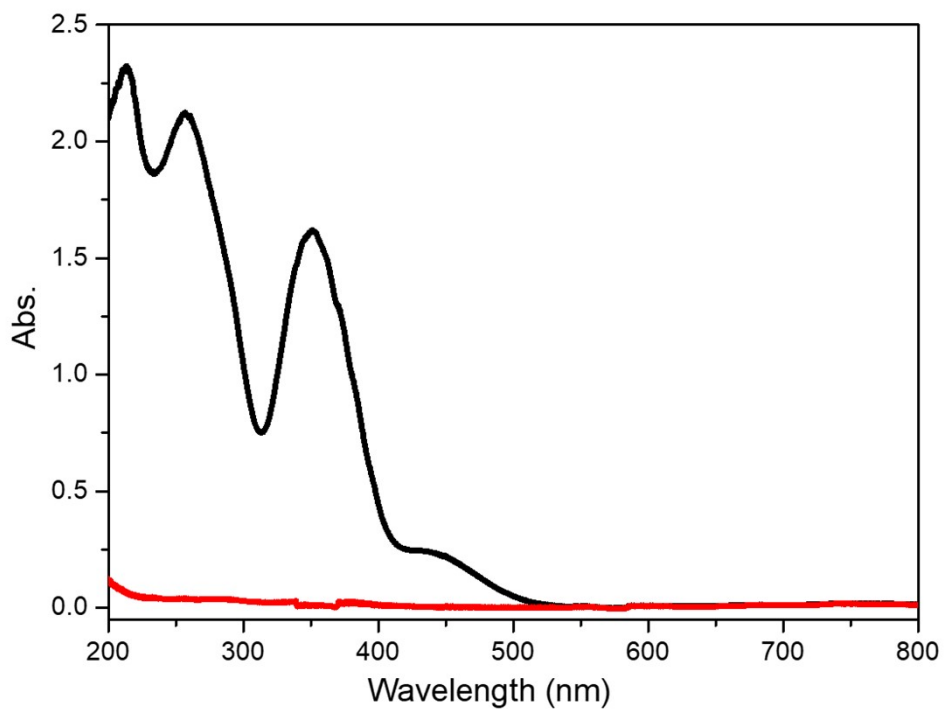

(a)

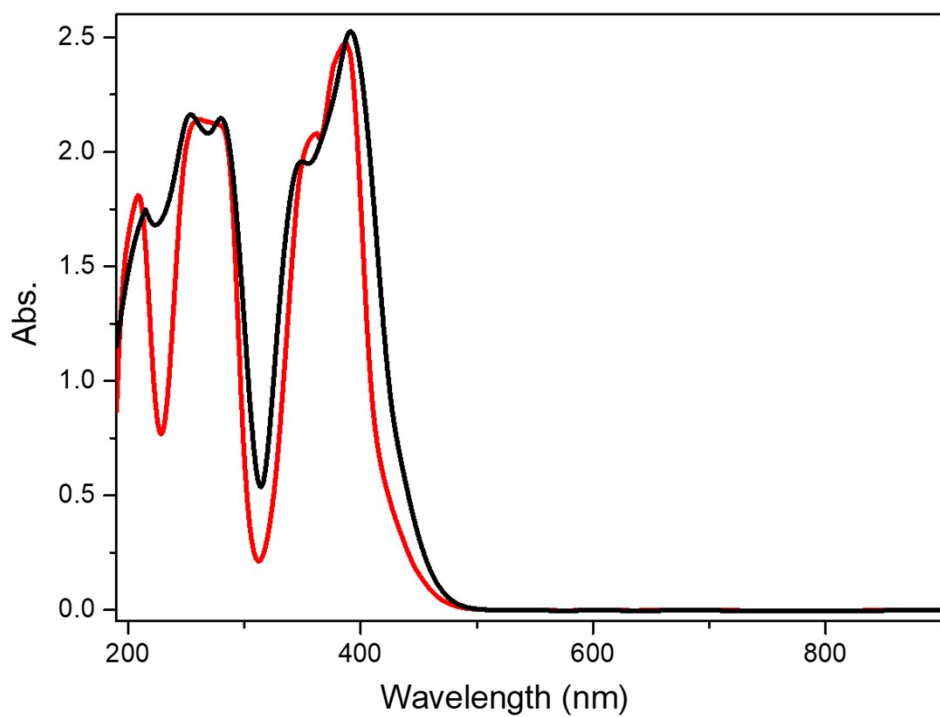

(b)

**Fig. S1.** UV-vis spectra and photographical images of the solution of  $\text{Cr}_2\text{O}_7^{2-}$  (a) and  $\text{CrO}_4^{2-}$  after the addition of Q[6] powder.

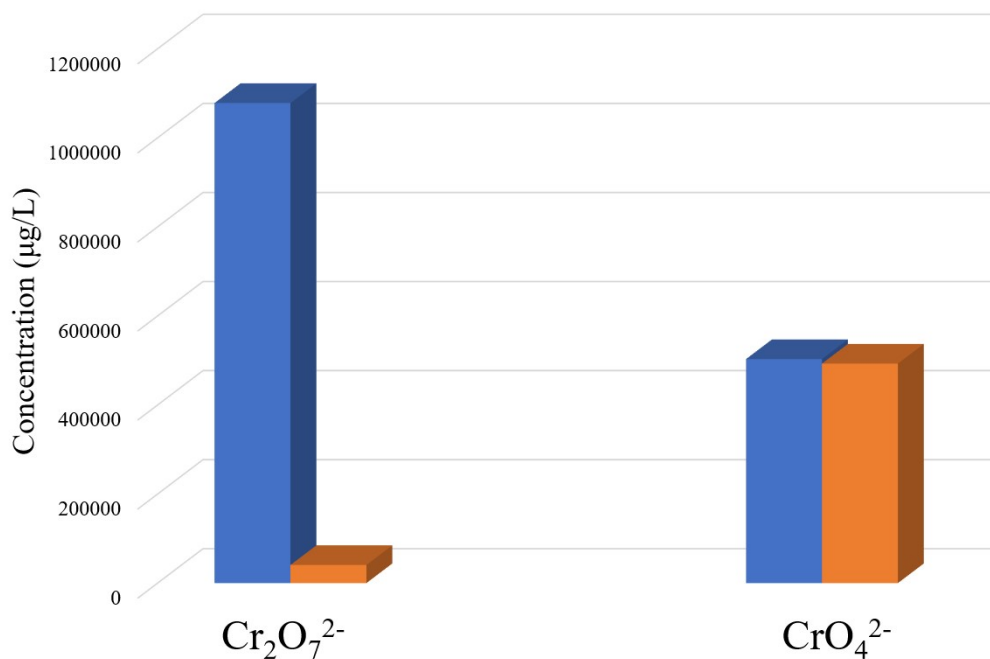

**Fig. S2.** ICP results of the supernatant solution of  $\text{Cr}_2\text{O}_7^{2-}$  and  $\text{CrO}_4^{2-}$  before and after addition of Q[6].

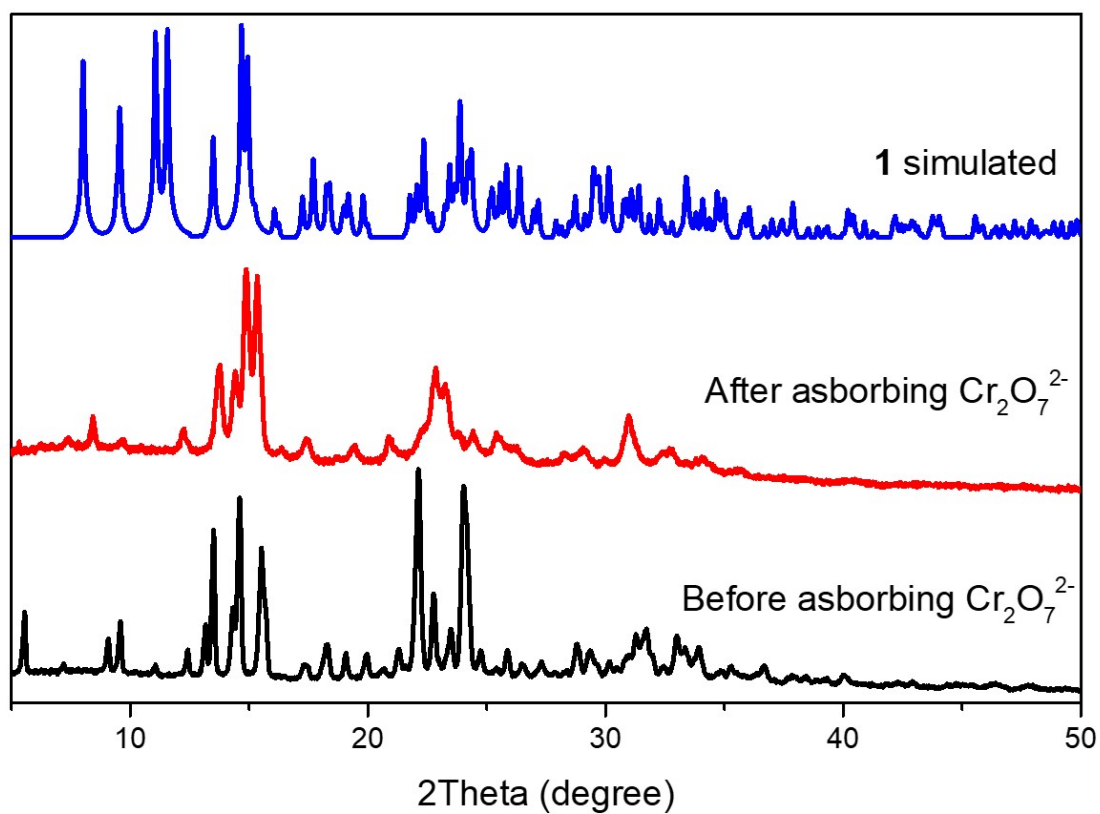

**Fig. S3.** PXRD patterns of Q[6] before and after absorbing  $\text{Cr}_2\text{O}_7^{2-}$ .

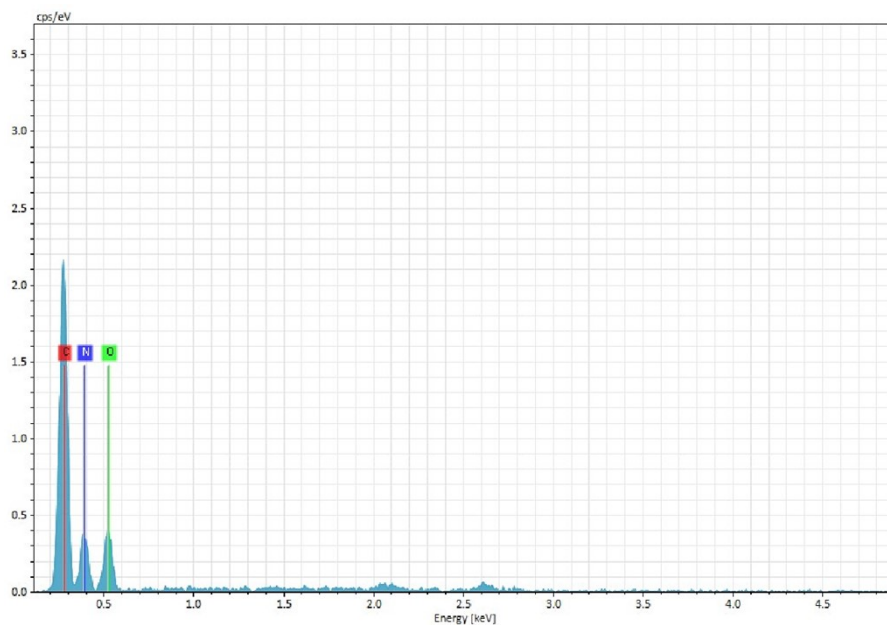

(a)

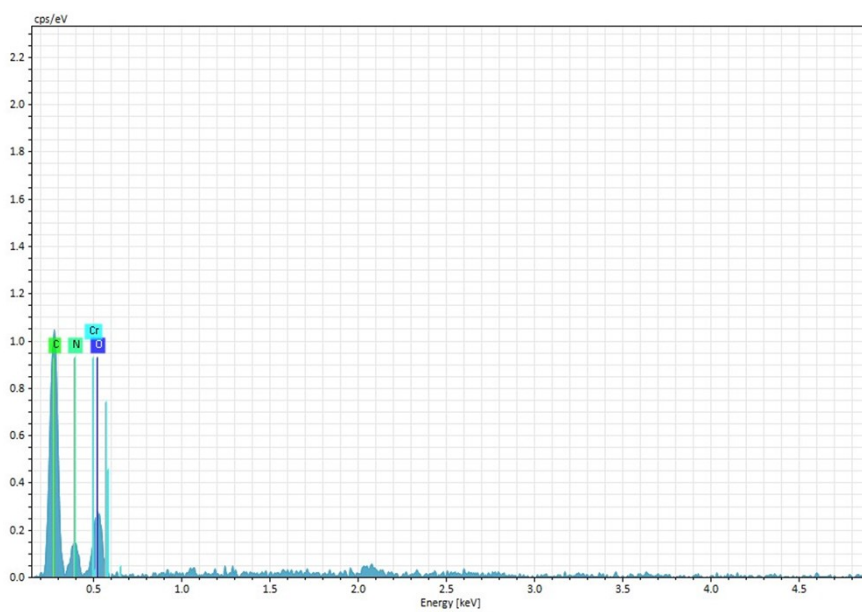

(b)

**Fig. S4.** EDS spectra of Q[6] before (a) and after (b) absorbing  $\text{Cr}_2\text{O}_7^{2-}$ .

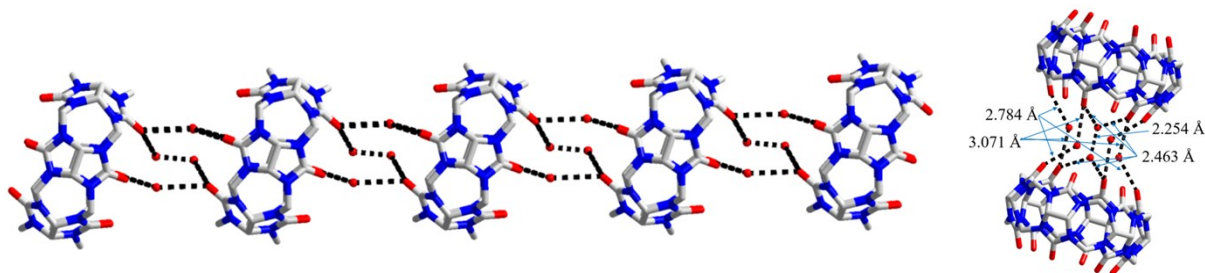

(a)

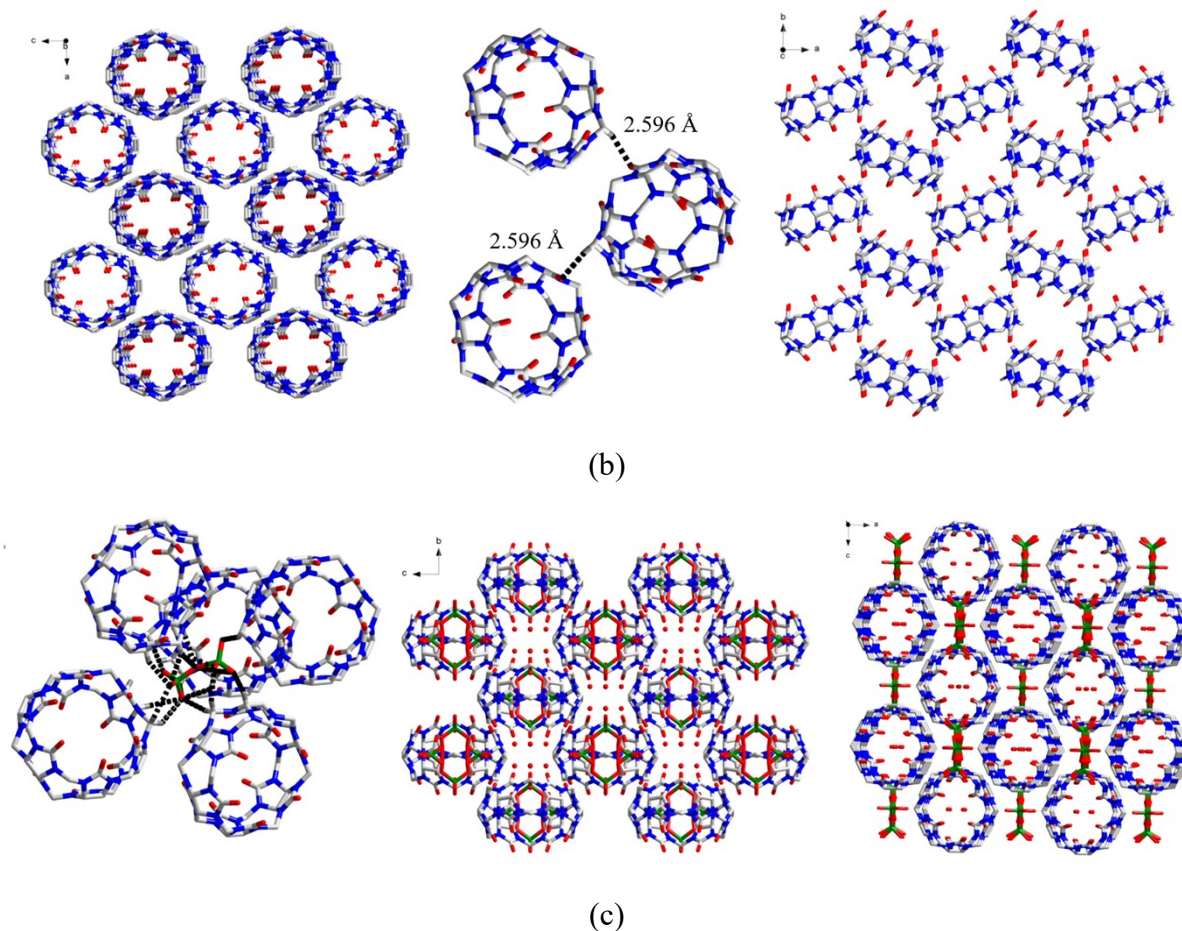

**Fig. S5.** (a) The supramolecular chains constructed from Q[6] via the O-H...O hydrogen bonds between the carbonyl groups and the solvent water molecules or hydronium cations. (b) The 3D supramolecular structure constructed from the 1D chains via the C-H...O hydrogen bonds between Q[6] molecules (solvent water molecule and hydronium cations are omitted for clarity). (c) The hydrogen bonds among the  $\text{Cr}_2\text{O}_7^{2-}$  anions, solvent water molecules and carbonyl groups of Q[6] and the final structure of **1** with water molecules and hydronium cations. Hydrogen atoms were omitted for clarity.



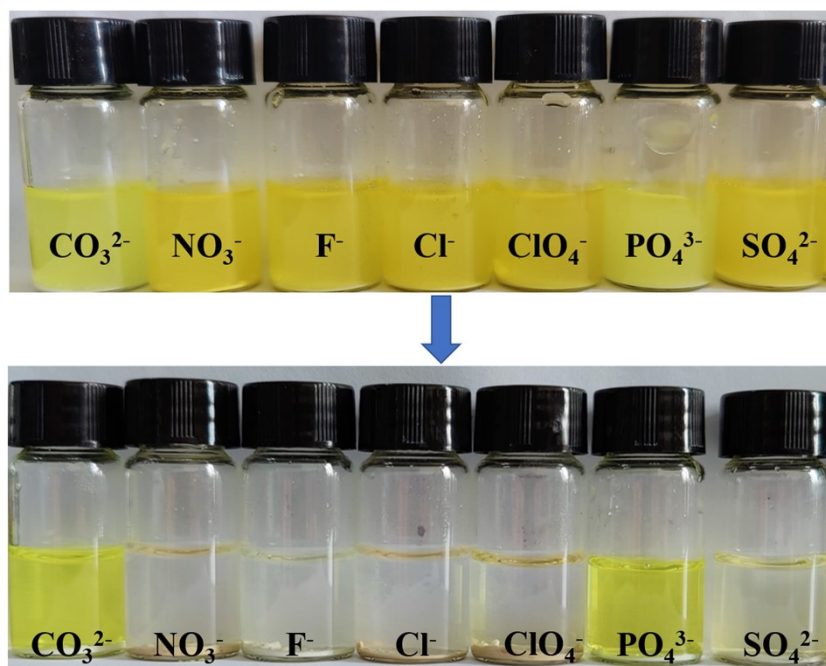

**Fig. S6.** The pictures of the solution of  $\text{Cr}_2\text{O}_7^{2-}$  after the addition of Q[6] in the presence of different anions.

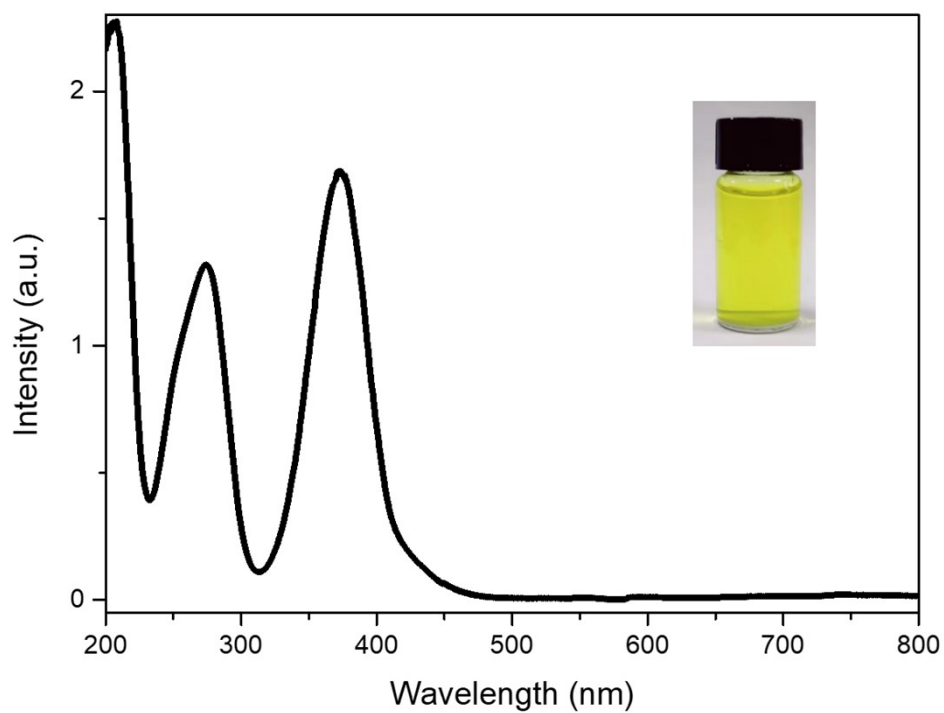

**Fig. S7.** UV-vis spectra and photographical images after soaking  $\text{Cr}_2\text{O}_7^{2-}$ -treated Q[6] in the solution of KOH for 2 h.

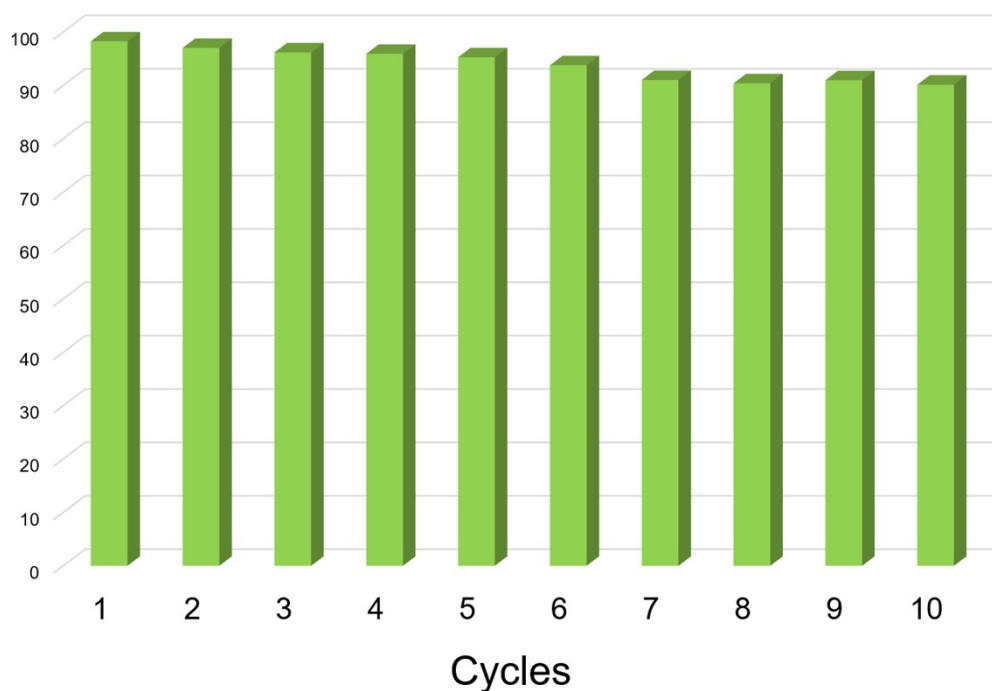

**Fig. S8.** The removal efficiency of Q[6] for  $\text{Cr}_2\text{O}_7^{2-}$  in ten cycles.

#### References:

1. A. Day, A. P. Arnold, R. J. Blanch and B. Snushal, *J. Org. Chem.*, 2001, **66**, 8094-8100.
2. *SAINT, Program for Data Extraction and Reduction*, Bruker AXS, Inc., Madison, WI, 2001.
3. G. M. Sheldrick, *SADABS, Program for Empirical Adsorption Correction of Area Detector Data*, University of Gottingen, Gottingen, Germany, 2003.
4. (a) G. M. Sheldrick, *SHELXS-2014, Program for the Crystal Structure Solution*, University of Gottingen, Gottingen, Germany, 2018; (b) G. M. Sheldrick, *SHELXL-2014, Program for the Crystal Structure Solution*, University of Gottingen, Gottingen, Germany, 2014.
5. (a) A. L. Spek, *Acta Crystallogr., Sect. A: Fundam. Crystallogr.*, 1990, **46**, 194; (b) A. L. Spek, *PLATON, A Multipurpose Crystallographic Tool*, Utrecht University, Utrecht, The Netherlands, 2005; or A. L. Spek, *J. Appl. Crystallogr.*, 2003, **36**, 7.
